# Supplementary material for: The tetraspanin TSPAN5 regulates AMPAR exocytosis by interacting with the AP4 complex
Source: eLife journal article supplement (doi:10.7554/elife.76425), 2023-01-30
Supplement: fig7-data1 [file Fig 7 - source data.xlsx]

## Sheet: Sheet1
7C		Surface myc intensity (% normalized on Scrambled)
		Scrambled	Sh-TSPAN5	Rescue
		177.48	54.34	69.32
		73.73	63.19	59.85
		107.43	20.66	50.85
		91.74	34.74	80.58
		127.57	26.97	102.49
		78.46	114.93	154.31
		160.13	36.88	139.51
		47.63	41.89	100.14
		57.98	115.95	19.16
		125.92	96	87.42
		70.8	66.95	201.71
		81.12	107.7	146
		165.58	126.38	136.44
		86.02	154.31	105.6
		85.62	150.53	105.5
		74.09	110.76	122.38
		72.72	70.18	66.47
		74.68	54.93	134.5
		140.95	90.32	123.75
		95.99	96.18	116.9
		78.39	58.65	59.62
		127.26	91.49	153.07
		80.35	30.69	179.26
		76.63	94.23	73.7
		79.56	91.49	108.11
		179.85	20.14	56.69
		82.3	30.69	77.02
			51.61	36.17
			94.23	122.18
			32.45	53.37
			20.14
			49.26
			51.61
			62.36
			32.45
			24.44
			49.26
			65.68
7E		GluA2/3 Mean Intensity (A.U.)
		Scrambled vehicle	Scrambled Leupeptin	Sh-TSPAN5 vehicle	Sh-TSPAN5 leupeptin
		29.697	22.557	15.6575	47.43
		28.4845	24.5685	24.8845	30.8775
		38.8185	20.3075	25.9055	28.8945
		41.9575	43.1245	38.2925	20.88
		27.987	49.619	33.773	23.594
		45.8865	39.6055	32.5395	16.0905
		25.241	44.565	19.072	33.282
		14.925	32.946	20.986	29.523
		18.798	24.53	19.604	54.418
		33.762	49.714	30.974	32.902
		52.796	38.261	21.68	31.187
		22.9464	40.5136	17.3382	30.2564
		13.5559	29.9237	19.0609	26.8147
		20.6966	27.0075	21.584	59.9142
		37.2057	54.7848	34.1333	36.258
		58.234	42.2019	23.913	34.3993
		31.25	36.95	24.5	33.3
		35.241	43.456	29.075	27.6554
		34.925	42.956	21.943	24.433
		18.798	33.53	23.44	43.328
7F		Surface myc intensity (% normalized on Scrambled)
		Scrambled	Sh-TSPAN5	Rescue
		64.67	62.3	138.89
		127.39	58.77	56.05
		135.23	24.76	55.24
		92.15	31	104.75
		129.51	71.92	62.82
		132.98	56.26	102.97
		92.93	54.14	127
		142.63	113.09	86.16
		79.37	37.67	103.89
		61.77	22.85	60.88
		97.72	30.12	34.85
		76.99	129.06	52.96
		66.66	40.68	131.83
		115.38	21.54	114.89
		77.95	51.28	100.54
		86.15	37.44	89.74
		98.97	70.26	78.46
		100.51	43.08	106.15
		101.03	53.33	68.21
		100.51	50.77	107.18
		89.74	26.67	29.74
		51.28	68.21	86.67
		88.72	48.72	36.41
		77.44	62.05	24.1
			26.67	131.28
			44.1	50.26
			80.51	60
				45.64
				103.08
