# Supplementary material for: The tetraspanin TSPAN5 regulates AMPAR exocytosis by interacting with the AP4 complex
Source: eLife. 2023 Feb 16;12:e76425. doi: 10.7554/eLife.76425 (PMC9934860; doi:10.7554/eLife.76425)
Supplement: Figure 1—source data 1. [file elife-76425-fig1-data1.xlsx]

## Sheet: Sheet1
1A	TSPAN5							Tfr
	Total/Tubulin		Intra/Tubulin		Extra/Tubulin			Total/Tubulin		Intra/Tubulin		Extra/Tubulin
	DIV12	DIV19	DIV12	DIV19	DIV12	DIV19		DIV12	DIV19	DIV12	DIV19	DIV12	DIV19
	3.47001	3.57133	2.51546	3.26431	3.00375	5.61324		6.47222	6.49404	6.99186	6.28272	3.93949	5.84419
	2.24456	3.50805	2.32433	3.94928	3.76043	2.74911		4.31162	3.98001	4.15757	6.23377	4.85186	5.16628
	2.93156	3.72563	2.86935	3.76122	2.93883	2.37502		3.8217	2.97825	1.39367	1.66766	6.01432	8.30421
	1.74966	2.62153	2.8635	3.35372	0.504189	0.745381
1B	N° of dendritic spines/μm					Dendritic spine morphology (%)
	Scrambled	Sh-TSPAN5	Rescue			Scrambled			Sh-TSPAN5			Rescue
	0.511713	0.354656	0.853025			Stubby	Thin	Mushroom	Stubby	Thin	Mushroom	Stubby	Thin	Mushroom
	0.45039	0.306083	0.718673			26.3006	53.1792	20.5202	39.3443	40.1639	20.4918	23.0769	55.3114	21.6117
	0.442136	0.226264	0.661574			30.8333	48.3333	20.8333	34.6154	46.1538	19.2308	35.8396	37.8446	26.3158
	0.611566	0.229866	0.789778			30.83	56.1265	13.0435	38.6555	38.6555	22.6891	38.4354	32.3129	29.2517
	0.538531	0.364384	0.697395			28.866	35.567	35.567	45.2381	30.9524	23.8095	28.2787	44.6721	27.0492
	0.388553	0.312781	0.518839			36	42	22	32.5444	40.2367	27.2189	29.434	43.3962	27.1698
	0.452814	0.328443	0.59976			39.4872	38.9744	21.5385	24.7126	54.023	21.2644	36.5854	35.7724	27.6423
	0.504297	0.349007	0.918965			41.5179	33.4821	25	35	52	13	36.1878	33.7017	30.1105
	0.688654	0.35	0.66773			32.95	23.871	23.2258	41.2844	41.2844	17.4312	19.685	59.5801	20.7349
	0.393237	0.472517	0.606481			22.58	28.3525	38.6973	22.38	34.32	43.3	26.6833	42.8928	30.4239
	0.460403	0.577228	0.762546			27.1137	40.09	37.33	25.7653	36.4796	37.7551	32.0917	43.2665	24.6418
	0.577778	0.506155	0.751174			27.6923	34.6939	38.1924	21.43	35.71	42.8571	30.8442	39.6104	29.5455
	0.483029	0.382	0.55336			27.027	35.1923	37.1154	23.4742	35.21	41.32	26.875	42.5	30.625
	0.603225	0.618012	0.669456			34.3675	47.61	25.3638	28.27	26.178	45.5497	24.2857	20.7143	55
		0.614537	0.69726				43.9141	21.7184	30.1508	39.6985	30.1508	33.75	21.6667	44.5833
		0.523111	0.557895						22.5806	44.086	33.3333	27.78	31.48	40.74
			0.372428						18.5792	53.0055	28.4153	31.1321	35.3774	33.4906
												19.8895	27.0718	53.0387
