# Supplementary material for: The tetraspanin TSPAN5 regulates AMPAR exocytosis by interacting with the AP4 complex
Source: eLife. 2023 Feb 16;12:e76425. doi: 10.7554/eLife.76425 (PMC9934860; doi:10.7554/eLife.76425)
Supplement: Figure 2—source data 1. [file elife-76425-fig2-data1.xlsx]

## Sheet: Sheet1
	Protein Name	Full legth	C ter (aa253-268)
	EIF1B	x	x
	SECISBP2L	x	x
	MGAT4A	x	x
	PRKAB2	x	x
	USP8	x	x
	USP50	x	x
	CREB1	x	x
	EPRS	x	x
	DCTN6	x	x
	AP4S1	x	x
	PAIP1	x	x
	ANKRD49	x	x
	HSPA5	x	x
	YWHAZ	x	x
	NDFIP1	x	x
	GOLGA6L10	x	x
	GOLGA6L9	x	x
	GOLGA6C	x	x
	GOLGA8B	x	x
	GOLGA8A	x	x
	SPCS2	x	x
	PCNP	x	x
	GPM6A	x	x
	EDIL3	x	x
	KBTBD11	x	x
	EIF1AX	x
	SLBP	x
	AQR	x
	ACSL6	x
	CREB1	x
	CCDC85A	x
	KLHL9	x
	SRSF7	x
	OSBPL1A	x
2D	Pulldown/Input intensity
	GluA2/3	GluA1
	1.0177	0.5685
	1.0331	0.8008
	1.2295	0.5275
