# Supplementary material for: The tetraspanin TSPAN5 regulates AMPAR exocytosis by interacting with the AP4 complex
Source: eLife. 2023 Feb 16;12:e76425. doi: 10.7554/eLife.76425 (PMC9934860; doi:10.7554/eLife.76425)
Supplement: Figure 3—source data 1. [file elife-76425-fig3-data1.xlsx]

## Sheet: Sheet1
3B	Fractions	EEA1			Rab7			Vglut			TfR
		N1	N2	N3	N1	N2	N3	N1	N2	N3	N1	N2	N3
	1	0.121	0.172	0.29	0.063	0	0	0	0	0.061	0	0	0.012
	2	0.219	0.191	0.357	0.048	0	0	0	0	0.054	0	0	0.016
	3	0.353	0.336	0.218	0.05	0	0	0.013	0	0.067	0.014	0.009	0.036
	4	0.07	0.259	0.079	0.077	0	0.103	0.194	0.209	0.179	0.022	0.047	0.021
	5	0.041	0.006	0.05	0.474	0.237	0.211	0.2	0.191	0.165	0.031	0.026	0.032
	6	0.02	0.022	0.003	0.259	0.22	0.275	0.096	0.115	0.085	0.039	0.035	0.066
	7	0.026	0.003	0	0.029	0.172	0.137	0.129	0.129	0.093	0.192	0.053	0.015
	8	0.037	0.004	0.002	0	0.216	0.09	0.127	0.109	0.093	0.24	0.072	0.293
	9	0.049	0.002	0.001	0	0.09	0.123	0.115	0.106	0.111	0.226	0.222	0.255
	10	0.065	0.004	0	0	0.064	0.062	0.125	0.139	0.093	0.235	0.535	0.253
	Fractions	GluA2			GluA1			Stargazin			TSPAN5			AP-4ε
		N1	N2	N3	N1	N2	N3	N1	N2	N3	N1	N2	N3	N1	N2	N3
	1	0	0	0	0.003	0.003	0.02	0.036	0	0	0	0.013	0	0	0	0
	2	0.002	0	0	0.004	0.015	0.03	0.01	0	0	0	0.007	0	0	0	0
	3	0.005	0.021	0	0.004	0.06	0.01	0.007	0	0.004	0	0.023	0	0	0	0
	4	0.042	0.038	0.024	0.059	0.094	0.043	0.011	0	0.015	0.104	0.024	0.093	0	0	0
	5	0.13	0.04	0.068	0.127	0.011	0.111	0.083	0	0.039	0.179	0.041	0.194	0	0	0
	6	0.207	0.043	0.093	0.168	0.034	0.127	0.104	0.026	0.089	0.079	0.015	0.143	0	0	0.153
	7	0.204	0.054	0.026	0.155	0.05	0.095	0.186	0.099	0.19	0.097	0.468	0.088	0.053	0.732	0
	8	0.143	0.111	0.264	0.158	0.054	0.228	0.138	0.24	0.21	0.097	0.2	0.123	0.124	0.089	0.285
	9	0.052	0.278	0.231	0.131	0.162	0.143	0.146	0.17	0.316	0.139	0.118	0.183	0.268	0.04	0.333
	10	0.216	0.415	0.294	0.191	0.517	0.193	0.277	0.465	0.136	0.305	0.09	0.176	0.555	0.139	0.23
3C	M1 Manders
	Rab4	Rab7	Rab11
	0.817	0.606	0.93
	0.732	0.86	0.952
	0.736	0.89	0.901
	0.735	0.814	0.921
	0.825	0.6	1
	0.77	0.98	0.98
3D	M1 Manders
	Rab5	Rab7	Rab11
	0.52	0.52	0.933
	0.687	0.331	1
	0.944	0.127	1
	0.975	0.263	0.953
	0.676	0.888	0.997
	0.282	0.232	0.98
	0.417	0.396	0.722
	0.02	0.883	0.926
	0.195	0.178	0.856
	0.83	0.129	0.999
	0.016	0.798	0.918
	0.283	0.563	0.985
	0.155	0.507	0.471
	0.119	0.151	0.893
	0.399	0	0.97
	0.684	0	0.951
	0.377	0
	0.392	0.729
