# Supplementary material for: The tetraspanin TSPAN5 regulates AMPAR exocytosis by interacting with the AP4 complex
Source: eLife. 2023 Feb 16;12:e76425. doi: 10.7554/eLife.76425 (PMC9934860; doi:10.7554/eLife.76425)
Supplement: Figure 4—source data 1. [file elife-76425-fig4-data1.xlsx]

## Sheet: Foglio1
Fig 4A	GLUA2 mean intensity Total			GLUA2 mean intensity Spines			GLUA2 mean intensity Shafts
	Scrambled	Sh-TSPAN5	Rescue	Scrambled	Sh-TSPAN5	Rescue	Scrambled	Sh-TSPAN5	Rescue
	17930	9741	15130	17378.3	11032.1	17762.2	19138.5	9956.8	17777.7
	11633	8190	20859	12260.8	13641.8	20393.8	11867.3	8238.66	25274.8
	15391	13873	15152	15838.7	16483.8	15698.9	16195.6	13628.5	16947.5
	16671	12141	10586	17602.7	16209.5	12165.8	17958	11546.6	12421.3
	20247.1	9549	20448	17814.2	13049.4	20790.6	17325.6	11368.8	20925.1
	30608.4	15874	23734.2	14200.1	17891.6	19808.1	13950.1	15941.6	19168
	12732.4	11557	22713	15589.5	13627.6	24920.5	16401.4	12511.7	25571.1
	25204	15543.6	19115.7	16668	6957.39	23880.9	15601.9	7136.95	25026.6
	15767.3	14835	25389.4	9975.47	16617.5	18924.8	10425.2	15470.6	20468.7
	12328.2	11845.9	5423.76	15166.1	13294.3	15527.1	16153.1	12067.1	13386
	19228.7	15450.1	8679.78	12267.3	16121.4	10296.5	12756.3	15955.8	10371.1
	19849.6	9342.47	12493.4	15680.6	11441.4	8071.86	16635.2	10550.4	7120.93
	22750.9	11862.6	11851.1	11876.3	12803.5	12539.5	12014.1	12655.2	9838.52
	13759	8731.18	8173.28	17250	9861.43	13819.4	15865.7	9368.22	12075.8
	15949.4	4945.08	11677.3	16117.3	3130.51	14263.9	18440.7	2930.44	14998.4
	13986.1	4967.91	18048.8	13863.4	4016.21	14118.5	14636.4	4066.49	12390.9
	7436.56	6640.44	13194.8	16765.9	5434.3	8751.53	16907.9	5029.48	9456.2
	8071.55	4512.83	15892.7	9315.41	7841.4	7708.8	9821.4	6737.19	6520.75
	4992.11	5152.48		9459.8	5141.15	5000.01	9658.41	4527.03	4930.49
	4445.66			10985.8	5516	6437.41	10805.8	4919.21	5564.4
	5898.81			12269.8			14319
	5650.95			16040.4			13853.2
	8414.74
Fig 4B	GLUA1 mean intensity Total			GLUA1 mean intensity Spines			GLUA1 mean intensity Shafts
	Scrambled	Sh-TSPAN5	Rescue	Scrambled	Sh-TSPAN5	Rescue	Scrambled	Sh-TSPAN5	Rescue
	8687.79	5518.6	15770.5	9945.15	7427.26	14602.2	8411.95	5135.81	16058.3
	5519.56	6863.04	12242.7	6910.12	7247.99	12581.6	5183.23	6788.01	12153.5
	11286.3	13612.8	19287.4	13164	13520.7	15962.9	11024.2	13638.1	20304.5
	8914.26	13005.3	8941.89	9951.03	12242.2	8751.16	8691.81	13191.2	8980
	5514.99	9800.75	11742.9	5719.27	9883.07	11925.8	5431.26	9782.39	11702.4
	10951.2	8998.03	10761.3	11929.4	10000.4	11958.1	10725.6	8645.4	10565.5
	6289.01	12047.4	14098.4	7443.43	11772.1	14400.4	6040.54	12107.4	14025.8
	8214.8	11924.5	10890.9	8693.27	12344.4	11151.7	8089.3	11837.1	10833.6
	11399.5	20171.5	8337.44	11284.1	17199.3	9816.77	11415.9	20560.2	7982.15
	13383.2	13653.5	11866.8	13272.2	14496.3	12150.5	13410.2	13498.6	11793.8
	10097.4	20959.7	8403.25	10155.3	24365.5	8799.04	10081	20395.5	8245.83
	10524	14606.5	11455.3	10264.8	16005.3	16450.4	10591.7	14247.9	10050.9
	9212.06	13084.9	10138.9	8481.69	11359.2	11634.2	9376.66	13446.8	9783.68
	11123.8	4511.8	8684.42	10605.1	8251.25	11068.6	11201.7	3672.65	8534.89
	10395.9	14022.4	14034	9672.39	14500.9	15809.4	10528.9	13962.4	13736.2
	11709.9	11969	12870.9	11983.8	12503.5	17480.4	11646.2	11752.7	11160
	13906.2	11960.2	19878.3	13603.1	12961.1	20477.8	13967.3	11528.4	19746.6
	8742.41	23719.5	6238.01	7813.19	22251.6	8879.18	8931.79	24050	5434.47
	9433.67	9113.89	8076.61	9269.31	9958.47	9733.7	9473.59	8992.46	7346.18
	12778	4712.09	4005.58	14671.9	6545.66	5070.22	12424.2	4198.05	3796.76
	6957.31	17663.2	10054.7	8742.56	21053.2	10735	6492.76	16809.3	9924.11
	4782.61	9082.43	9015.03	5748.72	8940.5	9576.92	4428.43	9099.47	8834.89
	4948.66	9973.7	9693.42	7667.53	12373.5	12130.7	4482.25	8973.79	8783.47
	10354.1	8384.24	6398.01	13633.2	13357.8	7702.22	9308.62	7251.93	5880.36
	6359.16	7446.18	6928.99	7546.25	7760.07	8772.38	6107.92	7405.36	6232.51
	7671.4	17029.6	18099.9	9462.95	18979	20311.3	7160.85	16608.2	17414.9
	17928.2	10411.6	9951.26	20185.5	11482	11557.7	17430.6	10053.4	9338.8
	9136.84	10342.9	5584.45	11855.8	12727.7	7496.71	8166.25	9441.76	5413.88
	17876.8	9349.94	9285.7	16274.4	10906.7	10090.1	18199.9	8861.19	8983.41
	10730.1	17230.2	7412.36	11146.1	25922.5	10558	10569.6	14478	7005.22
	9649.51	17998	4660.67	11309.1	17773.8	5612.04	9360.43	18048	4585.64
	15663.3	13941.2	8775.37	19114.7	16493.2	10141.1	14976.9	13240	8158.37
	11650.1	17076.5	6699.71	16143.1	17790.7	7887.34	9808.61	16699.9	6542.63
	14819.7	14407.9	7139.84	17159.3	15769.6	9850.91	14162.8	13956	6806.17
	10294.4		4685.08	12298.4		5370.39	9678.83		4477.99
			5520.35			6170.97			5354.21
Fig 4C	GLUA2/3 levels normalized on tubulin
	Scrambled			Sh-TSPAN5			Rescue
	Total	Intracellular	Extracellular	Total	Intracellular	Extracellular	Total	Intracellular	Extracellular
	1.14613	0.802632	0.995598	0.801995	0.87594	0.853369	0.947132	0.898496	1.19472
	1.06234	0.853383	1.01592	0.834913	0.68797	0.833051	0.923192	0.569549	0.853369
	0.95611	0.780075	1.15814	0.704738	0.847744	0.485608	0.837905	0.676692	0.944802
	0.896259	1.31203	0.855401		0.43797	0.668473	1.07132	1.05451	1.36539
	1.05486	1.16917	0.755842	0.614963	0.644737	0.73146	0.840898	0.853383	0.877751
	0.884289	1.08271	1.2191	0.837905	0.781955	0.934643	0.912718	1.42293	1.15814
#DIV/0!
	* significant outlier
	GLUA1 levels normalized on tubulin
	Scrambled			Sh-TSPAN5			Rescue
	Total	Intracellular	Extracellular	Total	Intracellular	Extracellular	Total	Intracellular	Extracellular
	1.16449	0.565854	0.618182	2.40209	0.712195	2.20606	1.1436	1.5122	1.24848
	1.38381	2.59512	0.351515	2.34987	0.868293	2.52727	1.28982	0.965854	0.333333
	0.652742	0.17561	1.77576	1.05483	0.0585366	1.45455	1.12272	0.097561	1.75758
	0.798956	0.663415	1.25455	0.809399			1.01305	0.185366	1.49091
	* significant outlier
