# Supplementary material for: The tetraspanin TSPAN5 regulates AMPAR exocytosis by interacting with the AP4 complex
Source: eLife. 2023 Feb 16;12:e76425. doi: 10.7554/eLife.76425 (PMC9934860; doi:10.7554/eLife.76425)
Supplement: Figure 5—figure supplement 1—source data 1. [file elife-76425-fig5-figsupp1-data1.xlsx]

## Sheet: Sheet1
5A		AP4B DDCt values			AP4E DDCt values
		Ctrl guide RNA	AP4B gRNA	AP4E gRNA	Ctrl guide RNA	AP4B gRNA	AP4E gRNA
		1.0602	0.152336	0.194028	0.97513	0.304097	0.181316
		0.892547	0.211882	0.154999	1.12584	0.283436	0.271683
		1.05336	0.167744	0.109982	0.850864	0.34061	0.174035
5B		AP-4ε normalised on β3-Tubulin
		Ctrl guide RNA	AP4B gRNA	AP4E gRNA
		0.453971	0.063886	0.089139
		0.506407	0.026631	0.061017
		0.492347	0.064405	0.068717
