# Supplementary material for: The tetraspanin TSPAN5 regulates AMPAR exocytosis by interacting with the AP4 complex
Source: eLife. 2023 Feb 16;12:e76425. doi: 10.7554/eLife.76425 (PMC9934860; doi:10.7554/eLife.76425)
Supplement: Figure 5—figure supplement 2—source data 1. [file elife-76425-fig5-figsupp2-data1.xlsx]

## Sheet: Foglio1
		GluA2 Intracellular/Total Mean Intensity
		Scrambled 0'	Scrambled 5'	Scrambled 10'	Sh-TSPAN5 0'	Sh-TSPAN5 5'	Sh-TSPAN5 10'
		0.119355	0.258269	0.203343	0.111918	0.211446	0.228296
		0.211048	0.229474	0.17704	0.201835	0.165947	0.197362
		0.270404	0.247926	0.217382	0.128789	0.162687	0.195408
		0.180294	0.18271	0.160505	0.140963	0.182837	0.175041
		0.153887	0.169994	0.216931	0.195608	0.166476	0.205367
		0.175043	0.211594	0.193894	0.165079	0.177512	0.224652
		0.201439	0.217942	0.205376	0.113037	0.335302	0.226789
		0.139318	0.270515	0.200203	0.194968	0.331982	0.224544
		0.155425	0.171694	0.2191	0.197564	0.168141	0.20742
		0.118173	0.260851	0.191974	0.163445	0.164313	0.188072
		0.203454	0.250406	0.216297	0.137268	0.202737	0.218109
		0.208958	0.177388	0.222786	0.136857	0.208819	0.189953
		0.140711	0.27322	0.202205	0.196918	0.21356	0.230579
		0.278516	0.227202	0.175287	0.199836	0.164304	0.169943
