# Supplementary material for: The tetraspanin TSPAN5 regulates AMPAR exocytosis by interacting with the AP4 complex
Source: eLife. 2023 Feb 16;12:e76425. doi: 10.7554/eLife.76425 (PMC9934860; doi:10.7554/eLife.76425)
Supplement: Figure 5—source data 1. [file elife-76425-fig5-data1.xlsx]

## Sheet: Sheet1
5B		GluA2 surface value
		Scrambled	Sh-TSPAN5	Rescue ΔC
		29428	29170	26350
		33559	27770	30666
		30902	25276	22845
		41542	20163	21658
		24015	23243	25775
		30905	27315	32583
		40999	20795	27817
		26169	24831	20253
		28730	25244	27287
		22838	22506	22730
		29380	24508	23437
		37708	27139	22872
		29343	31498	32951
		38032	19853	31494
		24058	17852	31579
		23032	31140
		29840	21101
		26429	15425
			14601
5C		GluA2 surface value
		Scrambled			ShTSPAN5
		Ctrl guide RNA	AP4B gRNA	AP4E gRNA	Ctrl guide RNA	AP4B gRNA	AP4E gRNA
		21594.2	19741	18024.2	15394	22885	21645
		30672.8	23940.2	19596.4	12632	14758	17807
		23695.5	23182.9	15027.5	13999	19818	12488
		23386.6	25037.7	25180.6	11575	21051	17941
		26255.1	26168	34070.3	21241	25391	15518
		21300.1	26797.2	22874	24863	20502	10489
		22972.6	25574	22050	21216	14936	25070
		20898	24408	18404	18270	20805	25765
		21395	21639	15287	27222	21234	26297
		22149	26932	16905	31317	17224	26714
		31007	20116	20330	29049	18768	25709
		27162	19316	18169	21485	20768	28989
		27288	19699	18062	22536	18749	17373
		31095	20607	15994	18686	14812	15046
		22913	22443	20382	18356		19473
		22141	10060	10661	16250		15738
		26322	8295	16580	19878		16245
		21042	16420	20507	13584		18734
			13633
5D		#PLA puncta/cell
		Ctrl guide RNA	AP4B gRNA	AP4E gRNA
		6	0	0
		1	0	0
		0	0	0
		8	4	0
		2	0	0
		3	4	0
		14	5	2
		4	2	1
		7	0	6
		0	5	0
		1	0	1
		8	1	4
		4	0	2
		11	0	5
		3	0	4
		0		3
		0
		1
