# Supplementary material for: The tetraspanin TSPAN5 regulates AMPAR exocytosis by interacting with the AP4 complex
Source: eLife. 2023 Feb 16;12:e76425. doi: 10.7554/eLife.76425 (PMC9934860; doi:10.7554/eLife.76425)
Supplement: Figure 6—source data 1. [file elife-76425-fig6-data1.xlsx]

## Sheet: Sheet1
6C		Scrambled
	Time points
	0	0	0	0	0	0	0	0	0	0	0	0	0	0	0	0	0	0	0	0	0	0	0	0	0	0	0	0	0	0	0	0	0	0	0	0	0	0	0	0	0	0	0	0	0	0	0	0	0
	10	0.06429	-0.05737	0.039317	0.028701	-0.06108	0.071015	0.083591	0.046322	0.072802	0.087186	0.080307	0.235033	0.0104249	0.019922	0.018085	0.016546	0.02733	-0.00036	0.004574	0.033832	0.079357	0.056966	0.060806	0.060102	-0.01054	0.039096	0.032736	0.042488	0.045337	0.068236	0.098926	0.058195	0.129295	0.120052	0.03143	0.063014	0.100361	0.104121	-0.0413	0.057673	0.005039	0.009943	0.137371	0.073751	0.07284	0.052236	0.072066	0.006005
	20	0.060809	-0.0586	0.02422	0.034725	-0.02179	0.085583	0.116408	0.059435	0.083844	0.099914	0.08101	0.199385	0.0037226	-0.02808	0.022542	0.024347	-0.03289	-0.0087	0.016575	0.035191	0.089632	0.044628	0.051783	0.069905	0.009847	0.110109	0.060786	0.060545	0.031256	0.051311	0.119432	0.039687	0.125028	0.090213	0.028316	0.049478	0.093947	0.092578	-0.04177	0.071099	-0.00501	0.034772	0.090957	0.088329	0.067759	0.064829	0.086382	0.053581
	30	0.087446	-0.02597	0.036731	0.02516	-0.05648	0.047543	0.123937	0.030741	0.126129	0.117073	0.057213	0.215563	0.0150615	0.001518	0.016925	0.046177	0.043604	0.00568	0.047089	0.026934	0.064485	0.058187	0.050969	0.058748	-0.00473	0.078476	0.05588	0.073276	0.038283	0.051242	0.082459	0.041528	0.134523	0.055804	0.009552	0.058344	0.1081	0.104615	-0.03279	0.105876	0.005373	0.08717	0.08003	0.100945	0.072991	0.085019	0.088076	0.041204
	40	0.073125	-0.0516	-0.01134	0.038177	-0.0682	0.108828	0.126082	0.037756	0.122867	0.117526	0.075378	0.198744	0.0340447	0.011521	0.041498	0.046243	0.007519	0.003102	0.006327	0.016469	0.076242	0.063002	0.047307	0.071359	0.015918	0.063616	0.03383	0.046078	0.024462	0.05053	0.13186	0.031535	0.128371	0.056666	-0.00581	0.069131	0.094983	0.104658	-0.03767	0.048908	-0.00785	0.078679	0.045074	0.16147	0.079832	0.091563	0.096714	0.070564
	50	0.052708	-0.06969	0.025575	0.04287	-0.03798	0.023359	0.147585	0.063671	0.117621	0.119909	0.077124	0.183921	0.0336291	0.009298	0.048441	0.060961	0.072013	-0.01472	0.043163	0.011602	0.113039	0.051302	0.064147	0.051019	0.029418	0.054502	0.004233	0.011085	0.022174	0.057709	0.121745	0.024956	0.147957	0.101199	0.017041	0.033457	0.062334	0.137998	-0.04657	0.072761	0.08091	0.094403	0.055257	0.122435	0.085667	0.090663	0.074649	0.050159
	60	0.08571	-0.0527	0.090684	0.049396	-0.04639	0.045711	0.12096	0.058744	0.120477	0.143214	0.053852	0.203863	0.0386337	0.018878	0.021187	0.06365	0.021723	-0.00639	0.092097	0.024732	0.099862	0.01828	0.049724	0.074518	0.013679	0.065753	0.007421	0.004587	0.04591	0.061622	0.13793	0.025761	0.153338	0.093667	0.022299	0.072213	0.056447	0.104658	-0.03767	0.048908	-0.00785	0.078679	0.045074	0.119645	0.085679	0.086458	0.074934	0.050292
	120	0.098706	-0.05374	0.033726	0.062515	-0.03567	0.131442	0.141976	0.048829	0.151435	0.183394	0.077223	0.246815	0.0457801	-0.03663	-0.00977	0.066244	0.021514	0.014196	0.054649	0.023535	0.116126	0.056571	0.033609	0.063025	0.011634	0.110256	0.023471	-0.00373	0.013831	0.038825	0.110837	0.008234	0.14637	0.043734	0.018268	0.048305	0.068261	0.115094	-0.04171	0.0374	0.00702	0.072738	0.047014	0.079142	0.108829	0.0803	0.066687	0.029013
	180	0.109898	-0.04487	0.04868	0.027277	-0.01613	0.198227	0.122054	0.065082	0.131485	0.198668	0.127695	0.317459	0.0342749	-0.06222	0.024086	0.047415	0.046462	0.014634	0.116492	0.046519	0.098008	0.043761	0.071586	0.075927	0.023469	0.047392	0.040703	9.11e-05	0.000858	0.021773	0.068409	-0.01759	0.127066	0.039865	0.03816	0.044325	0.014034	0.083668	-0.04584	0.064681	0.017871	0.061553	0.001677	0.083096	0.087509	0.070278	0.091034	0.04262
	240	0.123523	-0.04594	0.064512	0.058882	0.016521	0.21154	0.128894	0.060997	0.117066	0.20697	0.138758	0.332006	0.0304062	-0.07705	0.009053	0.023565	0.047701	0.034238	0.112163	0.01304	0.154612	0.007873	0.059366	0.050035	-0.00122	0.000424	0.025488	0.011483	0.003637	0.006984	0.015584	-0.02472	0.139482	0.084345	0.052814	-0.00896	0.039921	0.048631	-0.05326	0.016994	-0.02858	0.064317	0.001255	0.037611	0.070661	0.06081	0.060274	0.067662
	300	0.115216	-0.03608	0.063506	0.079048	0.058363	0.162576	0.16145	0.077092	0.122245	0.18283	0.138804	0.263133	0.0203514	-0.09429	-0.0355	0.019136	0.012125	-0.01082	0.117674	0.007135	0.136319	0.029681	0.032628	0.048186	-0.01625	0.016197	0.02361	-0.00066	-0.00099	-0.00716	0.01378	-0.04237	0.110307	0.088003	0.064545	0.004217	0.002149	0.035983	-0.04762	0.038106	-0.02922	0.035155	-0.00366	0.057517	0.098361	0.059866	0.058074	0.116831
6G		Scrambled
	Time points
	0	0	0	0	0	0	0	0	0	0	0	0	0	0	0	0	0	0	0	0	0	0	0	0	0	0	0	0	0	0	0	0	0	0	0	0	0	0	0	0	0	0	0	0	0	0	0	0	0
	10	0.057333	0.019874	0.029775	-3.1e-05	-0.01582	0.05573	0.000203	0.145083	0.079728	0.081626	0.005366	0.030631	0.06838	0.057236	-0.00579	0.005498	0.025731	0.081355	0.076465	-0.01446	0.085638	0.01997	0.088493	0.207212	0.216195	0.150598	0.101895	0.035135	-0.0276	0.141823	0.112823	0.128442	0.089589	-0.00073	0.072686	0.173808	0.015586	0.091766	0.098198	0.011643	-0.00674	0.059549	0.079137	0.074387	-0.0568118	-0.09735	-0.14378	-0.04453
	20	0.06629	0.027997	0.041167	-0.00382	-0.02567	0.049092	-0.00279	0.119823	0.072821	0.087199	-0.00176	0.016601	0.044448	0.092295	0.020836	0.004213	0.016888	0.097947	0.055076	0.035293	0.105978	-0.00449	0.059392	0.261393	0.151467	0.058879	0.077448	0.056058	-0.00511	0.118458	0.10783	0.136875	0.098421	-0.00421	0.042429	0.192558	0.036417	0.11907	0.094758	0.022873	-0.02035	0.083619	0.113987	0.188573	-0.0321731	-0.0702	-0.1322	-0.0322
	30	0.047137	0.009949	0.046943	-0.02349	-0.00081	0.113751	-0.00817	0.130001	0.067007	0.109801	-0.00961	0.006943	0.073031	0.097133	0.004859	0.018804	0.025705	0.075135	0.06624	-0.01303	0.106602	-0.00149	0.039781	0.279864	0.182939	0.122762	0.109631	0.021173	0.002976	0.157423	0.110201	0.188574	0.10334	0.035317	0.076554	0.17715	0.063668	0.103246	0.104955	0.06848	-0.00946	0.089677	0.084417	0.141633	-0.0544377	-0.09665	-0.11561	-0.02251
	40	0.072774	0.03452	0.050888	-0.03405	0.005335	0.129228	-0.00251	0.122893	0.096234	0.104121	-0.01285	0.029489	0.116033	0.086897	-0.00441	-0.0155	-0.02557	0.075062	0.007295	0.03044	0.052216	-0.01714	0.084542	0.318672	0.204654	0.076131	0.086249	0.036539	0.009373	0.11005	0.100189	0.135699	0.107279	-0.01838	0.069495	0.190957	0.048759	0.076116	0.120719	0.032792	0.00795	0.095561	0.081386	0.128778	-0.0565526	-0.10365	-0.13071	-0.03716
	50	0.036199	0.041399	0.029323	-0.04776	0.013082	0.122616	-0.03372	0.121238	0.068055	0.089648	-0.00882	0.010763	0.087671	0.060062	0.007915	-0.00379	0.015575	0.092342	0.015912	0.050114	0.066412	-0.01284	0.070384	0.336124	0.176536	0.051468	0.114424	0.04649	0.010857	0.101538	0.090405	0.136341	0.103821	-0.00276	0.057231	0.192593	-0.02431	0.089448	0.098334	0.006539	-0.00854	0.11313	0.094414	0.119533	-0.0547092	-0.11362	-0.14278	-0.02287
	60	0.025727	0.028869	0.035594	-0.00986	0.012384	0.051983	-0.00283	0.14706	0.117676	0.076	0.016333	-0.01746	0.082341	0.049719	-0.00886	0.022097	0.004281	0.096815	0.061913	0.029069	0.084092	0.039931	0.127277	0.280334	0.207643	0.084974	0.022097	0.043975	0.010238	0.126894	0.104079	0.126878	0.089331	0.041091	0.088116	0.216767	-0.01167	0.091001	0.143596	-0.01033	0.003234	0.099642	0.107936	0.099711	-0.0684887	-0.10663	-0.12985	-0.03068
	120	0.133282	0.031134	0.057271	-0.04307	0.004142	0.079731	0.030212	0.113044	0.085143	0.113929	-0.01556	0.032127	0.158629	0.148456	0.006436	0.016441	0.035317	0.076059	0.048224	0.123182	0.094887	-0.02971	0.109513	0.323865	0.180638	0.079566	0.016441	0.040532	0.003752	0.118964	0.132808	0.145664	0.058995	0.013957	0.058386	0.143243	-0.04427	0.136703	0.114952	-0.01385	0.030917	0.056097	0.098899	0.129918	-0.0512603	-0.08989	-0.12012	-0.01193
	180	0.13825	0.085253	0.043263	0.022749	0.03926	0.06692	-0.00373	0.15484	0.093293	0.082897	0.008143	0.083646	0.14227	0.125212	-0.03297	0.026564	0.033489	0.053955	0.09329	0.115895	0.10517	-0.03114	0.159524	0.348088	0.162804	0.103784	0.026564	0.068382	-0.06325	0.08224	0.109656	0.114312	0.048044	-0.04221	0.046585	0.130421	0.007432	0.049919	0.168588	-0.01137	0.000943	0.066873	0.077747	0.10182	-0.0806958	-0.11648	-0.1445	-0.01654
	240	0.101065	0.056616	0.032186	0.013974	0.05452	0.075193	0.025649	0.190669	0.107986	0.083871	-0.00257	0.064168	0.066656	0.055607	-0.07403	0.020656	0.013691	0.03737	0.04144	0.021632	0.07357	-0.00077	0.095454	0.307472	0.123723	0.080733	0.020656	0.068382	-0.06325	0.08224	0.109656	0.114312	0.129618	0.00107	0.053561	0.119763	-0.02796	0.068603	0.128947	-0.0526	0.008726	0.081855	0.089561	0.068989	-0.0652321	-0.09046	-0.1125	0.01978
	300	0.080617	0.062762	0.020352	0.026368	0.017689	0.066861	0.033357	0.162097	0.073862	0.086877						-0.03569	-0.0455	0.034912	0.036389	0.079813	0.017235	0.009406	0.090045	0.32913	0.096336	0.077574	-0.03569	0.044014	-0.03946	0.100922	0.114213	0.071475	0.020385	-0.04265	0.010259	0.12582	-0.05042	0.014134	0.132858	-0.06273	0.010047	0.056048	0.06818	0.099808	-0.0804489	-0.11052	-0.13612	-0.00661
[truncated: 114 more columns]
