# Supplementary material for: The tetraspanin TSPAN5 regulates AMPAR exocytosis by interacting with the AP4 complex
Source: eLife. 2023 Feb 16;12:e76425. doi: 10.7554/eLife.76425 (PMC9934860; doi:10.7554/eLife.76425)
Supplement: Figure 7—figure supplement 1—source data 1. [file elife-76425-fig7-figsupp1-data1.xlsx]

## Sheet: Sheet1
A		GluA2 anterograde transport speed
		Scrambled	Sh-TSPAN5	Rescue
		1.33293	1.35318	1.47283
		1.55963	1.44884	2.03016
		1.85715	1.4244	1.5641
		1.57466	1.50842	1.74327
		1.61568	1.66542	1.84281
		1.72478	1.93921	1.70027
		1.594	1.88818	1.89521
		1.68925	1.8111	2.1671
		1.60625	1.67949	1.62753
		1.6762	2.04964	1.7955
		1.5553	1.64333	1.87819
		1.319	1.54553	1.49616
		1.322	1.5096	1.32
		1.39179	0.115	1.323
		1.79384	1.54754	1.35561
		1.7476	1.324	1.324
		1.68994	1.323	1.73963
		1.52032		1.70389
		1.3712		1.57353
		1.60944		1.73767
		1.45071		1.77524
		1.68153
		1.49673
		1.56858
		1.78687
B		GluA2 retrograde transport speed
		Scrambled	Sh-TSPAN5	Rescue
		1.358	1.33257	1.67678
		1.46026	1.42153	2.00667
		1.81184	1.61665	1.44525
		1.73282	1.501	2.23787
		1.55209	1.66808	1.77716
		1.52007	1.51692	1.4851
		0.66	1.67427	1.60581
		1.44259	1.78262	2.02494
		1.56225	1.55226	1.45372
		1.33438	1.54289	2.392
		1.3442	1.60373	1.71077
		1.346	1.46412	1.59019
		1.319	1.332	1.32
		7.067	5.179	1.323
		1.36875	1.79511	1.46884
		1.50288	2.486	1.33038
		1.60085	1.323	1.79955
		1.69502		1.62368
		1.5569		1.4546
		1.5375		1.48869
		1.34142		1.79533
		1.33871
		1.3745
		1.54339
		1.45934
		1.56114
		1.6249
C		GluA2 positive vesicles (Average number)
		Scrambled	Sh-TSPAN5	Rescue
		2.67679	4.15262	3.30518
		4.69753	4.71831	29.6955
		20.6804	13.0593	7.13191
		15.8392	5.31791	14.2898
		6.30174	11.7776	19.2053
		5.12237	5.99018	10.8455
		0.252039	5.7527	10.9153
		6.34077	11.8765	7.36436
		20.2779	9.60309	0.795557
		3.76365	12.4543	26.6562
		3.8896	8.79262	7.17525
		2.15919	3.19012	2.02564
		3.46415	2.18166	3.15163
		0.155394	0.127916	4.58041
		2.39341	0.312419	3.58393
		4.66709	0.243989	13.7502
		19.0297	8.87651	7.35095
		11.9195	0.381288	5.25244
		10.9771	0.510219	14.3735
		12.0147		14.7879
		7.39277
		2.37531
		4.16312
		10.498
		14.4901
		4.59313
		12.8382
